# Supplementary material for: Comparison of three health-related quality of life instruments in relation to visual acuity: EQ-5D, 15D, and EUROHIS-QOL8
Source: Springer Nature journal article supplement (doi:10.1007/s11136-022-03293-x), 2022-11-17
Supplement: MOESM1 [file 23721032]

# **Comparison of three health-related quality of life instruments in relation to visual acuity – EQ-5D, 15D, and EUROHIS-QOL8**

Quality of Life Research

Petri K M Purola, Seppo V P Koskinen, and Hannu M T Uusitalo

Corresponding author: Petri K M Purola

Department of Ophthalmology, Faculty of Medicine and Health Technology, Tampere University, Tampere, Finland

Finnish Register of Visual Impairment, Finnish Federation of the Visually Impaired, Helsinki, Finland

Email: [petri.purola@tuni.fi](mailto:petri.purola@tuni.fi)

**Online Resource 1** Index score and subscale score means (and standard errors) shown in Fig. 1

|                | Index score    |                |              | Usual activities |              |              | Vitality     |              | Mobility     |              | Pain / Discomfort |              |              | Anxiety / Depression |                 |               |
|----------------|----------------|----------------|--------------|------------------|--------------|--------------|--------------|--------------|--------------|--------------|-------------------|--------------|--------------|----------------------|-----------------|---------------|
|                | EQ-5D          | 15D            | EUROHIS-QOL8 | EQ-5D            | 15D          | EUROHIS-QOL8 | 15D          | EUROHIS-QOL8 | EQ-5D        | 15D          | EQ-5D             | 15D          | EUROHIS-QOL8 | EQ-5D                | 15D, depression | 15D, distress |
| VA $\geq$ 1.0  | 0.87<br>(0.00) | 0.93<br>(0.00) | 4.0<br>(0.0) | 2.9<br>(0.0)     | 4.8<br>(0.0) | 4.2<br>(0.0) | 4.6<br>(0.0) | 4.2<br>(0.0) | 2.8<br>(0.0) | 4.8<br>(0.0) | 2.5<br>(0.0)      | 4.3<br>(0.0) | 3.8<br>(0.0) | 2.9<br>(0.0)         | 4.7<br>(0.0)    | 4.8<br>(0.0)  |
| VA 0.63–0.8    | 0.78<br>(0.01) | 0.87<br>(0.01) | 3.8<br>(0.0) | 2.7<br>(0.0)     | 4.4<br>(0.1) | 3.9<br>(0.0) | 4.3<br>(0.0) | 3.9<br>(0.1) | 2.6<br>(0.0) | 4.5<br>(0.0) | 2.4<br>(0.0)      | 4.2<br>(0.0) | 3.5<br>(0.1) | 2.9<br>(0.0)         | 4.6<br>(0.0)    | 4.7<br>(0.0)  |
| VA 0.32–0.5    | 0.74<br>(0.02) | 0.86<br>(0.01) | 3.7<br>(0.1) | 2.6<br>(0.1)     | 4.3<br>(0.1) | 3.8<br>(0.1) | 4.3<br>(0.1) | 3.7<br>(0.1) | 2.4<br>(0.1) | 4.4<br>(0.1) | 2.3<br>(0.1)      | 4.2<br>(0.1) | 3.4<br>(0.1) | 2.8<br>(0.0)         | 4.6<br>(0.1)    | 4.7<br>(0.1)  |
| VA $\leq$ 0.25 | 0.57<br>(0.06) | 0.78<br>(0.03) | 3.6<br>(0.1) | 2.2<br>(0.1)     | 3.7<br>(0.3) | 3.4<br>(0.3) | 3.9<br>(0.2) | 3.6<br>(0.2) | 2.3<br>(0.1) | 4.0<br>(0.2) | 2.2<br>(0.1)      | 4.0<br>(0.1) | 3.0<br>(0.3) | 2.7<br>(0.1)         | 4.5<br>(0.1)    | 4.5<br>(0.1)  |

Scales of all three instruments have been standardized, i.e., higher score indicates better overall quality of life or condition. VA visual acuity.
