# Supplementary material for: Comparison of three health-related quality of life instruments in relation to visual acuity: EQ-5D, 15D, and EUROHIS-QOL8
Source: Springer Nature journal article supplement (doi:10.1007/s11136-022-03293-x), 2022-11-17
Supplement: MOESM2 [file 23721032]

# **Comparison of three health-related quality of life instruments in relation to visual acuity – EQ-5D, 15D, and EUROHIS-QOL8**

Quality of Life Research

Petri K M Purola, Seppo V P Koskinen, and Hannu M T Uusitalo

Corresponding author: Petri K M Purola

Department of Ophthalmology, Faculty of Medicine and Health Technology, Tampere University, Tampere, Finland

Finnish Register of Visual Impairment, Finnish Federation of the Visually Impaired, Helsinki, Finland

Email: [petri.purola@tuni.fi](mailto:petri.purola@tuni.fi)

**Online Resource 2** Statistical significance for index scores and subscale scores shown in Fig. 1

|                                | Index score, p    |                   |                   | Usual activities, p |                   |                   | Vitality, p       |                   | Mobility, p       |                   | Pain / Discomfort, p |               |                   | Anxiety / Depression, p |                 |               |
|--------------------------------|-------------------|-------------------|-------------------|---------------------|-------------------|-------------------|-------------------|-------------------|-------------------|-------------------|----------------------|---------------|-------------------|-------------------------|-----------------|---------------|
|                                | EQ-5D             | 15D               | EUROHIS-QOL8      | EQ-5D               | 15D               | EUROHIS-QOL8      | 15D               | EUROHIS-QOL8      | EQ-5D             | 15D               | EQ-5D                | 15D           | EUROHIS-QOL8      | EQ-5D                   | 15D, depression | 15D, distress |
| VA 0.63–0.8 vs.<br>VA ≥ 1.0    | <b>&lt;0.0001</b> | <b>&lt;0.0001</b> | <b>&lt;0.0001</b> | <b>&lt;0.0001</b>   | <b>&lt;0.0001</b> | <b>&lt;0.0001</b> | <b>&lt;0.0001</b> | <b>&lt;0.0001</b> | <b>&lt;0.0001</b> | <b>&lt;0.0001</b> | <b>&lt;0.0001</b>    | <b>0.0003</b> | <b>&lt;0.0001</b> | 0.1594                  | 0.1984          | <b>0.0022</b> |
| VA 0.32–0.5 vs.<br>VA ≥ 1.0    | <b>&lt;0.0001</b> | <b>&lt;0.0001</b> | <b>&lt;0.0001</b> | <b>&lt;0.0001</b>   | <b>&lt;0.0001</b> | <b>&lt;0.0001</b> | <b>&lt;0.0001</b> | <b>&lt;0.0001</b> | <b>&lt;0.0001</b> | <b>&lt;0.0001</b> | <b>0.0004</b>        | 0.0531        | <b>0.0013</b>     | 0.1613                  | 0.3862          | 1.0000        |
| VA ≤ 0.25 vs.<br>VA ≥ 1.0      | <b>&lt;0.0001</b> | <b>&lt;0.0001</b> | <b>0.0460</b>     | <b>&lt;0.0001</b>   | <b>&lt;0.0001</b> | <b>0.0023</b>     | <b>0.0030</b>     | 0.0627            | <b>&lt;0.0001</b> | <b>&lt;0.0001</b> | <b>0.0162</b>        | 0.1244        | 0.1264            | <b>0.0058</b>           | 0.2585          | 0.0923        |
| VA 0.32–0.5 vs.<br>VA 0.63–0.8 | 0.6787            | 0.4131            | 0.5430            | 1.0000              | 0.3201            | 1.0000            | 1.0000            | 0.3760            | <b>0.0460</b>     | 0.0754            | 1.0000               | 1.0000        | 1.0000            | 1.0000                  | 1.0000          | 1.0000        |
| VA ≤ 0.25 vs.<br>VA 0.63–0.8   | <b>0.0136</b>     | <b>0.0406</b>     | 1.0000            | <b>&lt;0.0001</b>   | <b>0.0342</b>     | 0.8735            | 0.6290            | 1.0000            | <b>0.0181</b>     | <b>0.0223</b>     | 0.8798               | 1.0000        | 1.0000            | <b>0.0423</b>           | 0.8603          | 0.7930        |
| VA ≤ 0.25 vs.<br>VA 0.32–0.5   | 0.2059            | 0.5512            | 1.0000            | <b>&lt;0.0001</b>   | 0.5271            | 1.0000            | 1.0000            | 1.0000            | 0.7520            | 0.7008            | 1.0000               | 1.0000        | 1.0000            | 0.2225                  | 1.0000          | 0.4035        |

P-values were calculated using Kruskal–Wallis test adjusted with Dunn–Bonferroni correction. Bolded values denote statistical significance with  $p < 0.05$ . VA visual acuity.
